# Supplementary material for: Ecotoxicological effects of tungsten on celery (Apium graveolens L) and pepper (Capsicum spp.)
Source: PeerJ. 2024 Jun 24;12:e17601. doi: 10.7717/peerj.17601 (PMC11210458; doi:10.7717/peerj.17601)
Supplement: Supplemental Information 1 [file peerj-12-17601-s001.xlsx]

## Sheet: Biochemical  indicator 
Table 1 The growth indices of plant
Plant	W treatment (mg/L)	root length (cm)	sd of root length	shoot height (cm)	sd of shoot height	Root fresh weight (g/plant)	sd of root fresh weight	Sterm fresh weight (g/plant)	sd of sterm fresh weight	Leaf fresh weight (g/plant)	sd of leaf fresh weight
Celery	0	73.4071	10.1779	168.831	27.7055	0.0960333	0.02	0.906378	0.12	0.543572	0.02
	10	76.3278	14.3412	159.374	21.6633	0.164083	0.03	1.16243	0.08	0.814183	0.1
	20	62.9319	12.1029	145	15.8111	0.234656	0.05	0.976656	0.04	0.748583	0.06
	40	53.12	7.42011	120.528	19.7117	0.266194	0.03	0.400044	0.02	0.483322	0.04
	60	47.23	6.81572	118	22.4342	0.0845833	0.01	0.285067	0.02	0.273856	0.01
Peper	0	90.9679	12.4154	155.895	23.1284	0.71515	0.06	0.908267	0.04	1.50623	0.07
	10	65.9033	11.5167	142.442	26.2691	0.4181	0.02	0.6836	0.08	1.18438	0.06
	20	53.3778	5.61032	130.055	17.4269	0.625683	0.01	1.11527	0.1	1.86435	0.04
	40	51.1824	6.56254	116.827	22.8847	0.525917	0.02	0.64215	0.02	1.12713	0.03
	60	44.9198	4.96078	81.2825	10.6975	0.337	0.02	0.304667	0.03	0.713067	0.06
Note: sd represents the standard deviation of parallel samples
Table 2 The pigment of plant
Plant	W treatment	C_a (mg/g)	sd of C_a	C_b (mg/g)	sd of C_b	Total Chlorophyll(mg/g)
Celery	0	0.448418	0.0579744	0.291749	0.0264449	0.740167
	10	0.43735	0.0356588	0.268853	0.0293224	0.666203
	20	0.442902	0.0619159	0.298781	0.0290349	0.741683
	40	0.433484	0.0543531	0.263284	0.0134445	0.669768
	60	0.231303	0.025574	0.0860733	0.007941	0.317376
Peper	0	0.822176	0.0520679	1.97701	0.137454	2.79919
	10	0.824456	0.0762307	1.94346	0.233755	2.76792
	20	0.82267	0.0527596	2.04911	0.215378	2.87178
	40	0.832051	0.0887759	1.80188	0.11537	2.63393
	60	0.861742	0.11808	1.8503	0.253564	2.53204
Note: sd represents the standard deviation of parallel samples
Table 3 The MDA, TAOC, CAT, SOD and POD of plant
Plant	W treatment	MDA (mmol/g fresh weight)			TAOC (U g fresh weight)			CAT (U/ g fresh weight)			POD (U/ g fresh weight)			SOD (U/ g fresh weight)
		Root	Stem	Leaf	Root	Stem	Leaf	Root	Stem	Leaf	Root	Stem	Leaf	Root	Stem	Leaf
Celery	0	6.78466	3.09301	4.24184	5.74487	14.5089	38.3445	0.915716	12.7742	4.15422	255.116	242.234	294.105	134	280.32	337.638
	10	8.49645	4.63951	9.51694	7.66693	16.7927	49.0902	2.59678	26.0216	8.80982	305.738	357.459	412.612	483.24	551.612	853.948
	20	10.0654	5.56741	9.95797	6.5004	15.9089	48.1146	4.06151	34.8388	6.69127	292.795	322.979	276.839	659.612	649.193	846.748
	40	10.2069	7.42321	12.7986	9.94305	21.477	61.4412	4.7312	38.3227	27.2954	333.163	500.12	538.197	616.4	793.255	1142.77
	60	11.341	10.1226	16.49	10.2464	43.3878	98.32	25.2598	53.226	49.6776	470.122	623.396	890.52	832.32	803.455	1177.34
Peper	0	2.29714	1.17024	6.48605	0.776043	3.87346	5.99843	2.10796	5.3226	5.84442	219.891	244.568	167.428	534.919	389.501	523.395
	10	2.52126	1.07866	7.45631	2.77774	4.82087	7.42414	2.41364	5.80647	8.37655	265.504	410.27	227.342	544.47	479.45	554.307
	20	6.55027	1.25299	7.851	3.4653	7.29157	12.7895	4.05422	18.8837	7.48673	252.487	537.366	238.254	650.7	536	567.435
	40	7.25414	2.58429	8.26972	3.90218	10.818	14.3355	4.7312	31.0485	10.4086	330.217	579.397	217.065	633.395	577.192	619.781
	60	7.80162	2.58429	9.0876	5.02385	12.5945	17.7213	20.89	34.0646	21.5599	464.238	630.043	276.46	812.01	614.167	630

## Sheet: IBRv2 result
Table 4 The result of IBRv2
leaf for IBRv2	W treatment	TAOC	CAT	POD	SOD	MDA
Celery	0	0	0	0	0	0
	10	0.766375	0.816193	0.77389	2.0149	1.75472
	20	0.704104	0.517546	-0.138294	1.99652	1.85308
	40	1.46255	2.044	1.38126	2.64754	2.39805
	60	2.92099	2.69418	2.53232	2.71226	2.94833
Pepper	0	0	0	0	0	0
	10	0.424811	0.822756	1.89787	0.830712	1.21086
	20	1.50833	0.566056	2.18876	1.16957	1.65889
	40	1.73566	1.31922	1.61088	2.44696	2.1102
	60	2.15806	2.98371	3.11149	2.68371	2.92938
root for IBRv2	W treatment	TAOC	CAT	POD	SOD	MDA
Celery	0	0	0	0	0	0
	10	1.25341	0.963137	0.873463	1.98949	1.25108
	20	0.536598	1.37644	0.664718	2.47209	2.19337
	40	2.38239	1.51747	1.28797	2.36699	2.27102
	60	2.51291	3.06525	2.94969	2.83281	2.8569
Pepper	0	0	0	0	0	0
	10	1.97788	0.168031	0.744213	0.10979	0.175777
	20	2.32091	0.811558	0.545726	1.2156	1.97857
	40	2.50508	1.00317	1.60538	1.04838	2.17129
	60	2.89697	2.84593	2.9503	2.58962	2.30868
stem for IBRv2	W treatment	TAOC	CAT	POD	SOD	MDA
Celery	0	0	0	0	0	0
	10	0.373452	1.47142	1.20708	1.72929	0.978285
	20	0.235328	2.0749	0.89242	2.14541	1.41818
	40	1.002	2.27201	2.24885	2.6574	2.11228
	60	2.79844	2.95138	2.93235	2.69004	2.86061
Pepper	0	0	0	0	0	0
	10	0.475129	0.107967	1.4978	1.28906	-0.208188
	20	1.37361	1.57132	2.27914	1.9808	0.174533
	40	2.23024	2.18833	2.49718	2.44016	2.02391
	60	2.56041	2.30337	2.7398	2.82539	2.02391

## Sheet: the detail for IBRv2 calculate
Table 5 The calculation of IBRv2 for celery
	treatment	MDA			TAOC			CAT			POD			SOD
		Root	Stem	Leaf	Root	Stem	Leaf	Root	Stem	Leaf	Root	Stem	Leaf	Root	Stem	Leaf
Celery	0	6.78466	3.09301	4.24184	5.74487	14.5089	38.3445	0.915716	12.7742	4.15422	255.116	242.234	294.105	134	280.32	337.638
	10	8.49645	4.63951	9.51694	7.66693	16.7927	49.0902	2.59678	26.0216	8.80982	305.738	357.459	412.612	483.24	551.612	853.948
	20	10.0654	5.56741	9.95797	6.5004	15.9089	48.1146	4.06151	34.8388	6.69127	292.795	322.979	276.839	659.612	649.193	846.748
	40	10.2069	7.42321	12.7986	9.94305	21.477	61.4412	4.7312	38.3227	27.2954	333.163	500.12	538.197	616.4	793.255	1142.77
	60	11.341	10.1226	16.49	10.2464	43.3878	98.32	25.2598	53.226	49.6776	470.122	623.396	890.52	832.32	803.455	1177.34
Yi	0	0.000298224	0.00042222	0.000188036	0.000368403	-3.37019e-05	5.27403e-06	-0.00202708	0.00014406	0.00044174	-6.09594e-06	6.96473e-06	-7.1265e-06	-1.92865e-16	0	-2.83587e-06
	10	0.0980078	0.176513	0.351131	0.125709	0.0634531	0.107298	0.450647	0.309143	0.326919	0.0786055	0.168998	0.147032	0.557058	0.293979	0.402977
	20	0.1716	0.255695	0.370805	0.0540282	0.039972	0.0985799	0.6449	0.435873	0.20746	0.0598185	0.124946	-0.026283	0.692184	0.364719	0.399301
	40	0.177665	0.380633	0.479798	0.238608	0.170306	0.204762	0.711183	0.477265	0.818041	0.115912	0.314846	0.262432	0.662758	0.451759	0.529505
	60	0.223422	0.515332	0.589855	0.251659	0.475701	0.408944	1.43864	0.619933	1.07811	0.265466	0.410536	0.481134	0.793186	0.457308	0.542448
Yi_μ		0.134199	0.265719	0.358355	0.134075	0.14988	0.163918	0.648669	0.368472	0.486195	0.103959	0.203867	0.172861	0.541037	0.313553	0.374846
Yi_σ		0.0780874	0.175472	0.198409	0.099104	0.172395	0.138599	0.467033	0.209187	0.399877	0.0890251	0.144244	0.186153	0.280791	0.167978	0.196932
Zi	0	-1.71449	-1.49765	-1.79906	-1.29632	-0.882551	-1.14282	-1.38729	-1.76122	-1.2239	-1.11118	-1.42852	-0.894774	-1.92857	-1.82353	-1.85001
	10	-0.463409	-0.51937	-0.0443426	-0.0429055	-0.509099	-0.376445	-0.424155	-0.289795	-0.407703	-0.237716	-0.221444	-0.120884	0.0609217	-0.0942391	0.164887
	20	0.478876	-0.0794738	0.0540246	-0.759718	-0.647223	-0.438715	-0.010852	0.313679	-0.706349	-0.446461	-0.536102	-1.03307	0.543514	0.321879	0.146503
	40	0.556529	0.61463	0.59899	1.08608	0.119446	0.319729	0.130177	0.510787	0.820103	0.176796	0.820331	0.486482	0.438421	0.833874	0.797526
	60	1.14241	1.36296	1.14927	1.21659	1.91589	1.77817	1.67796	1.19016	1.47028	1.83851	1.50383	1.63755	0.904234	0.866515	0.862242
Z0		-1.71449	-1.49765	-1.79906	-1.29632	-0.882551	-1.14282	-1.38729	-1.76122	-1.2239	-1.11118	-1.42852	-0.894774	-1.92857	-1.82353	-1.85001
Ai	0	0	0	0	0	0	0	0	0	0	0	0	0	0	0	0
	10	1.25108	0.978285	1.75472	1.25341	0.373452	0.766375	0.963137	1.47142	0.816193	0.873463	1.20708	0.77389	1.98949	1.72929	2.0149
	20	2.19337	1.41818	1.85308	0.536598	0.235328	0.704104	1.37644	2.0749	0.517546	0.664718	0.89242	-0.138294	2.47209	2.14541	1.99652
	40	2.27102	2.11228	2.39805	2.38239	1.002	1.46255	1.51747	2.27201	2.044	1.28797	2.24885	1.38126	2.36699	2.6574	2.64754
	60	2.8569	2.86061	2.94833	2.51291	2.79844	2.92099	3.06525	2.95138	2.69418	2.94969	2.93235	2.53232	2.83281	2.69004	2.71226
Table 6 The calculation of IBRv2 for pepper
Peper	0	2.29714	1.17024	6.48605	0.776043	3.87346	5.99843	2.10796	5.3226	5.84442	219.891	244.568	167.428	534.919	389.501	523.395
	10	2.52126	1.07866	7.45631	2.77774	4.82087	7.42414	2.41364	5.80647	8.37655	265.504	410.27	227.342	544.47	479.45	554.307
	20	6.55027	1.25299	7.851	3.4653	7.29157	12.7895	4.05422	18.8837	7.48673	252.487	537.366	238.254	650.7	536	567.435
	40	7.25414	2.58429	8.26972	3.90218	10.818	14.3355	4.7312	31.0485	10.4086	330.217	579.397	217.065	633.395	577.192	619.781
	60	7.80162	2.58429	9.0876	5.02385	12.5945	17.7213	20.89	34.0646	21.5599	464.238	630.043	276.46	812.01	614.167	630
Yi	0	-0.000539526	9.03426e-05	-0.000264071	-0.00220902	0.000388669	-0.000113806	-0.000420122	0.000212083	0.000328719	2.80448e-06	-3.58137e-06	-5.34405e-06	-5.23798e-07	1.20933e-06	3.88583e-06
	10	0.0398891	-0.0353016	0.060279	0.551597	0.0954145	0.092495	0.0583908	0.0380006	0.156652	0.0818663	0.224667	0.132846	0.00768474	0.0902354	0.0249253
	20	0.454532	0.029761	0.0826803	0.647646	0.27511	0.328702	0.283625	0.550174	0.107879	0.0600327	0.341867	0.153208	0.0850917	0.138657	0.035091
	40	0.498858	0.344155	0.105246	0.699212	0.446437	0.378261	0.350689	0.766129	0.250981	0.176594	0.374573	0.112756	0.0733859	0.170813	0.0734126
	60	0.530457	0.344155	0.146205	0.808942	0.512471	0.470344	0.995656	0.806392	0.567234	0.324535	0.410967	0.217799	0.181273	0.197779	0.0805151
Yi_μ		0.304639	0.136572	0.0788292	0.541038	0.265964	0.253937	0.337588	0.432182	0.216615	0.128606	0.270414	0.123321	0.0694869	0.119497	0.0427896
Yi_σ		0.234269	0.170738	0.0486868	0.284037	0.196488	0.178036	0.354496	0.348555	0.193035	0.11324	0.148949	0.0710366	0.0654259	0.0696619	0.0302324
Zi	0	-1.30669	-0.822998	-1.60528	-1.93646	-1.34806	-1.14731	-0.972629	-1.22797	-1.15616	-1.18179	-1.80002	-1.71436	-1.00001	-1.71427	-1.3332
	10	-1.13092	-1.03119	-0.394421	0.0414178	-0.872927	-0.7225	-0.804598	-1.12	-0.333409	-0.437579	-0.302223	0.183508	-0.890218	-0.425208	-0.502491
	20	0.671876	-0.648465	0.0536057	0.384451	0.0255496	0.361018	-0.161071	0.343355	-0.590108	-0.636066	0.479116	0.474396	0.215596	0.266533	-0.163633
	40	0.864601	1.20091	0.504922	0.568615	0.882187	0.588352	0.0305393	0.960368	0.163058	0.423585	0.697155	-0.103483	0.0483702	0.725894	1.11375
	60	1.00199	1.20091	1.32409	0.960509	1.21235	1.01075	1.8733	1.07541	1.82755	1.7685	0.93978	1.39713	1.58961	1.11113	1.3505
Z0		-1.30669	-0.822998	-1.60528	-1.93646	-1.34806	-1.14731	-0.972629	-1.22797	-1.15616	-1.18179	-1.80002	-1.71436	-1.00001	-1.71427	-1.3332
Ai	0	0	0	0	0	0	0	0	0	0	0	0	0	0	0	0
	10	0.175777	-0.208188	1.21086	1.97788	0.475129	0.424811	0.168031	0.107967	0.822756	0.744213	1.4978	1.89787	0.10979	1.28906	0.830712
	20	1.97857	0.174533	1.65889	2.32091	1.37361	1.50833	0.811558	1.57132	0.566056	0.545726	2.27914	2.18876	1.2156	1.9808	1.16957
	40	2.17129	2.02391	2.1102	2.50508	2.23024	1.73566	1.00317	2.18833	1.31922	1.60538	2.49718	1.61088	1.04838	2.44016	2.44696
	60	2.30868	2.02391	2.92938	2.89697	2.56041	2.15806	2.84593	2.30337	2.98371	2.9503	2.7398	3.11149	2.58962	2.82539	2.68371
